# Supplementary material
Source: PubMed Central journal article supplement (PMC6547225)
Supplement: jama-321-2113-s001.pdf [file jama-321-2113-s001.pdf]

## Supplementary Online Content

Ekker MS, Verhoeven JI, Vaartjes I, Jolink WMT, Klijn CJM, de Leeuw F-E. Association of stroke among adults aged 18 to 49 years with long-term mortality. *JAMA*. doi:10.1001/jama.2019.6560

**eTable 1.** Overview of Used ICD-9 and ICD-10 Codes

**eTable 2.** Results of Validation Procedure of ICD Codes in Young Patients With Stroke

**eTable 3.** ICD Codes of Causes of Death

**eTable 4.** Demographics Including Age, Sex, Comorbidity and Follow-up of Stroke of 30-Day Survivors

**eTable 5.** Sex-Specific Mortality for Any Stroke and Stroke Subtypes

**eTable 6.** Annual Case Fatality, 1-Year Mortality and 5-Year Mortality Stratified for Stroke Subtypes, and Sex

This supplementary material has been provided by the authors to give readers additional information about their work.

**eTable 1. Overview of Used ICD-9 and ICD-10 Codes**

| <b>ICD-9</b>                    |                                                                                  |
|---------------------------------|----------------------------------------------------------------------------------|
| <b>Any stroke</b>               |                                                                                  |
| 431                             | Intracerebral hemorrhage                                                         |
| 433                             | Occlusion and stenosis of pre-cerebral arteries with/without cerebral infarction |
| 434                             | Occlusion of cerebral arteries with/without cerebral infarction                  |
| 436                             | Stroke, unspecified as hemorrhagic or infarction                                 |
| <b>Intracerebral hemorrhage</b> |                                                                                  |
| 431                             | Intracerebral hemorrhage                                                         |
| <b>Ischemic stroke</b>          |                                                                                  |
| 433                             | Occlusion and stenosis of pre-cerebral arteries with/without cerebral infarction |
| 434                             | Occlusion of cerebral arteries with/without cerebral infarction                  |
| <b>Unspecified stroke</b>       |                                                                                  |
| 436                             | Stroke, unspecified as hemorrhagic or infarction                                 |
| <b>ICD-10</b>                   |                                                                                  |
| <b>Any stroke</b>               |                                                                                  |
| I61                             | Intracerebral hemorrhage                                                         |
| I63                             | Cerebral infarction                                                              |
| I64                             | Stroke, unspecified as hemorrhagic or infarction                                 |
| <b>Intracerebral hemorrhage</b> |                                                                                  |
| I61                             | Intracerebral hemorrhage                                                         |
| <b>Ischemic stroke</b>          |                                                                                  |
| I63                             | Cerebral infarction                                                              |
| <b>Unspecified stroke</b>       |                                                                                  |
| I64                             | Stroke, unspecified as hemorrhagic or infarction                                 |

**eTable 2. Results of Validation Procedure\* of ICD Codes in Young Patients With Stroke**

| Diagnosis assigned by Statistics Netherlands  |                                            |                                |                                   |
|-----------------------------------------------|--------------------------------------------|--------------------------------|-----------------------------------|
|                                               | Ischemic stroke                            | Intracerebral hemorrhage       | Unspecified stroke                |
| <b>Total N</b>                                | 301                                        | 183                            | 85                                |
| <b>Correct diagnosis, N (%)</b>               | 272/301 (90.4%)                            | 158/183 (86.3%)                | 74/85 (87.1%)                     |
| <b>Incorrect diagnoses N (%)</b>              | 29/301 (9.6%)                              | 25/183 (13.6%)                 | 11/85 (12.9%)                     |
| <b>Differentiation of incorrect diagnosis</b> | 5/301 (1.7%) – conversion                  | 10/183 (5.5%) – PMH            | 4/85 (4.7%) – conversion          |
|                                               | 4/301 (1.3%) – vestibulopathy              | 4/183 (2.2%) - traumatic       | 3/85 (3.5%) – neoplasm            |
|                                               | 3/301 (1.0%) – TIA <sup>a</sup>            | 3/183 (1.6%) – SAH             | 2/85 (2.3%) – TIA                 |
|                                               | 3/301 (1.0%) – ICH <sup>b</sup>            | 8/183 (4.4%) – ischemic stroke | 1/85 (1.2%) – traumatic ICH       |
|                                               | 3/301 (1.0%) – SAH <sup>c</sup>            |                                | 1/85(1.2%) – CADASIL <sup>g</sup> |
|                                               | 2/301 (0.7%) – neoplasm                    |                                |                                   |
|                                               | 2/301 (0.7%) – encephalitis / meningitis   |                                |                                   |
|                                               | 1/301 (0.3%) – migraine with aura          |                                |                                   |
|                                               | 1/301 (0.3%) – HaNDL syndrome <sup>d</sup> |                                |                                   |
|                                               | 1/301 (0.3%) – SUSAC syndrome              |                                |                                   |
|                                               | 1/301 (0.3%) – subdural hematoma           |                                |                                   |
|                                               | 1/301 (0.3%) – MS <sup>e</sup>             |                                |                                   |
|                                               | 1/301 (0.3%) – PMH <sup>f</sup>            |                                |                                   |
| 1/301 (0.3%) – traumatic ICH                  |                                            |                                |                                   |

\* based on cross-checking the ICD codes assigned by the coders of Statistics Netherlands with the original source data from the clinical files

Due to rounding off to one decimal, summed percentages may deviate from 100%.

<sup>a</sup> TIA = transient ischemic attack

<sup>b</sup> ICH = intracerebral hemorrhage

<sup>c</sup> SAH = subarachnoid hemorrhage

<sup>d</sup> HaNDL syndrome = 'Headache and Neurological Deficit with cerebrospinal fluid Lymphocytosis'

<sup>e</sup> MS = multiple sclerosis

**eTable 3. ICD Codes of Causes of Death**

| <b>Causes of death</b>   | <b>ICD-10 codes</b>                                                                        |
|--------------------------|--------------------------------------------------------------------------------------------|
| Any stroke               | I60, I61, I62, I63, I64, I67, I68, I69, G45                                                |
| Ischemic stroke          | I63                                                                                        |
| Intracerebral hemorrhage | I61                                                                                        |
| Composite vascular       | I10 - I15, I20 - I25, I33 - I35, I38, I42, I44, I46 - I51, I70 - I72 - I77, I80 - I82, I99 |
| Cardiac                  | I20 - I25, I33 - I35, I38, I42, I44, I46 - I51                                             |
| Other vascular           | I10 - I15, I70 - I72 - I77, I80 - I82, I99                                                 |
| Other stroke-related     | I60, I62, I67, I68, I69                                                                    |
| Malignancies             | C00 - C97, D00 - D48                                                                       |
| Hematological malignancy | C81 - C97                                                                                  |
| Breast cancer            | C50, D05                                                                                   |
| Lung cancer              | C34, D022                                                                                  |
| Melanoma                 | C43, D03                                                                                   |
| Brain tumor              | C71                                                                                        |
| Other forms of cancer    | C00 - C97, D00 - D48 except C81 - C97, C50, D05, D34, D022, C43, D03 and C71               |
| Infections               | A00 - A99, B00 - B99, J130, J220                                                           |
| Trauma                   | S00 - S99, T00 - T98, V01 - V99, W00 - W99, X00 - X99, Y00 - Y98                           |
| Miscellaneous            | All other                                                                                  |

**eTable 4. Demographics Including Age, Sex, Comorbidity, and Follow-up of Stroke of 30-Day Survivors**

|                                       | N (%)       | Mean age, y (SD) | Charlson Comorbidity Index |             |             |               | Follow-up (FU)            |                           |
|---------------------------------------|-------------|------------------|----------------------------|-------------|-------------|---------------|---------------------------|---------------------------|
|                                       |             |                  | Score 0 (%)                | Score 1 (%) | Score 2 (%) | Score >=3 (%) | Median FU, in years (IQR) | N Deaths at end of FU (%) |
| <b>Any stroke</b>                     | 13481 (100) | 41.76 (6.8)      | 11282 (83.7)               | 1601 (11.9) | 455 (3.4)   | 143 (1.1)     | 10.19 (7.1 – 13.6)        | 1764 (13.1)               |
| men                                   | 6299 (46.7) | 42.31 (6.4)      | 5235 (83.1)                | 767 (12.2)  | 223 (3.5)   | 74 (1.2)      | 9.95 (6.7 – 13.4)         | 988 (15.7)                |
| women                                 | 7182 (53.3) | 41.28 (7.0)      | 6047 (84.2)                | 834 (11.6)  | 232 (3.2)   | 69 (1.0)      | 10.33 (7.3 – 13.8)        | 776 (10.8)                |
| <b>Ischemic stroke</b>                | 7815 (100)  | 41.97 (6.6)      | 6653 (85.1)                | 844 (10.8)  | 246 (3.1)   | 72 (0.9)      | 9.99 (7.0 – 13.5)         | 947 (12.1)                |
| men                                   | 3560 (45.6) | 42.62 (6.1)      | 3016 (84.7)                | 383 (10.8)  | 126 (3.5)   | 35 (1.0)      | 9.75 (6.8 – 13.3)         | 534 (14.7)                |
| women                                 | 4255 (54.4) | 41.42 (6.9)      | 3637 (85.5)                | 461 (10.9)  | 120 (2.8)   | 37 (0.9)      | 10.17 (7.2 – 13.7)        | 423 (9.9)                 |
| <b>Intracerebral hemorrhage</b>       | 2086 (100)  | 40.38 (7.7)      | 1667 (79.9)                | 304 (14.6)  | 85 (4.1)    | 30 (1.4)      | 10.16 (6.7 – 14.0)        | 349 (16.7)                |
| men                                   | 1113 (53.4) | 40.53 (7.5)      | 891 (80.1)                 | 165 (14.8)  | 41 (3.7)    | 16 (1.4)      | 9.93 (6.6 – 13.6)         | 210 (18.9)                |
| women                                 | 973 (46.6)  | 40.21 (7.9)      | 776 (79.8)                 | 139 (14.3)  | 44 (4.5)    | 14 (1.4)      | 10.35 (6.9 – 14.3)        | 139 (14.3)                |
| <b>Stroke not otherwise specified</b> | 3580 (100)  | 42.12 (6.5)      | 2962 (82.7)                | 453 (12.7)  | 124 (3.5)   | 41 (1.1)      | 10.58 (7.5 – 13.7)        | 468 (13.1)                |
| men                                   | 1626 (45.4) | 42.86 (6.0)      | 1328 (81.7)                | 219 (13.5)  | 56 (3.4)    | 23 (1.4)      | 10.45 (7.3 – 13.7)        | 254 (15.6)                |
| women                                 | 1954 (54.6) | 41.50 (6.7)      | 1634 (83.6)                | 234 (12.0)  | 68 (3.5)    | 18 (0.9)      | 10.69 (7.6 – 13.8)        | 214 (11.0)                |

Duration of Follow up is defined as time between event and death or end of study, whichever occurred first in years

SD = standard deviation, IQR = interquartile range.

CCI score of 0 means no comorbidity, the higher the CCI score, the more comorbidity.

**eTable 5. Sex-Specific Mortality for Any Stroke and Stroke Subtypes**

|                                       | N at risk <sup>a</sup> | Case fatalities |       | Deaths at end of FU |       | N at risk <sup>b</sup> | 1 year cum. Mortality |         | 5 year cum. mortality |           | 10 year cum. Mortality |           | 15 year cum. Mortality |           |
|---------------------------------------|------------------------|-----------------|-------|---------------------|-------|------------------------|-----------------------|---------|-----------------------|-----------|------------------------|-----------|------------------------|-----------|
|                                       |                        | N               | %     | N                   | %     |                        | %                     | 95% CI  | %                     | 95% CI    | %                      | 95% CI    | %                      | 95% CI    |
| <b>Any stroke</b>                     | 15257                  | 1776            | 11.6% | 3540                | 23.2% | 13481                  | 3.1%                  | 2.8-3.4 | 7.0%                  | 6.6-7.4   | 11.5%                  | 11.0-12.1 | 17.0%                  | 16.2-17.9 |
| men                                   | 7127                   | 828             | 11.6% | 1816                | 25.5% | 6299                   | 3.5%                  | 3.1-4.0 | 8.1%                  | 7.5-8.8   | 13.8%                  | 12.9-14.7 | 20.8%                  | 19.5-22.2 |
| women                                 | 8130                   | 948             | 11.7% | 1724                | 21.2% | 7182                   | 2.8%                  | 2.4-3.2 | 6.0%                  | 5.5-6.6   | 9.5%                   | 8.9-10.3  | 13.7%                  | 12.7-14.8 |
| <b>Ischemic stroke</b>                | 8444                   | 629             | 7.4%  | 1576                | 18.7% | 7815                   | 2.5%                  | 2.2-2.8 | 5.9%                  | 5.4-6.4   | 10.6%                  | 9.9-11.4  | 16.4%                  | 15.3-17.6 |
| men                                   | 3851                   | 291             | 7.6%  | 815                 | 21.2% | 3560                   | 2.6%                  | 2.1-3.2 | 6.9%                  | 6.1-7.8   | 13.0%                  | 11.8-14.2 | 20.5%                  | 18.7-22.4 |
| women                                 | 4593                   | 338             | 7.4%  | 761                 | 16.6% | 4255                   | 2.4%                  | 1.9-2.9 | 5.0%                  | 4.4-5.7   | 8.6%                   | 7.8-9.6   | 13.1%                  | 11.8-14.6 |
| <b>Intracerebral hemorrhage</b>       | 3077                   | 991             | 32.2% | 1340                | 43.5% | 2086                   | 6.8%                  | 5.8-7.9 | 11.7%                 | 10.4-13.2 | 15.7%                  | 14.1-17.4 | 19.1%                  | 17.2-21.1 |
| men                                   | 1585                   | 472             | 29.8% | 682                 | 43.0% | 1113                   | 7.4%                  | 6.0-9.1 | 12.9%                 | 11.1-15.1 | 17.6%                  | 15.4-20.1 | 21.9%                  | 19.2-25.1 |
| women                                 | 1492                   | 519             | 34.8% | 658                 | 44.1% | 973                    | 6.1%                  | 4.7-7.8 | 10.3%                 | 8.5-12.4  | 13.4%                  | 11.4-15.8 | 15.8%                  | 13.4-18.6 |
| <b>Stroke not otherwise specified</b> | 3736                   | 156             | 4.2%  | 624                 | 16.7% | 3580                   | 2.4%                  | 2.0-3.0 | 6.6%                  | 5.8-7.5   | 11.0%                  | 10.0-12.2 | 17.2%                  | 15.6-18.9 |
| men                                   | 1691                   | 65              | 3.8%  | 319                 | 18.9% | 1626                   | 2.8%                  | 2.1-3.7 | 7.4%                  | 6.2-8.8   | 12.8%                  | 11.2-14.6 | 21.0%                  | 18.4-23.9 |
| women                                 | 2045                   | 91              | 4.4%  | 320                 | 15.6% | 1954                   | 2.2%                  | 1.6-2.9 | 5.9%                  | 5.0-7.1   | 9.6%                   | 8.3-11.0  | 14.0%                  | 12.1-16.2 |

<sup>a</sup> Number (%) of case fatalities and number of deaths at end of follow-up (%) calculated in total study population.

<sup>b</sup> 1-year, 5-year, 10-year and 15-year mortality (% and 95%CI) was calculated in 30-day survivors of the study population.

**eTable 6. Annual Case Fatality, 1-Year Mortality and 5-Year Mortality Stratified for Stroke Subtypes, and Sex**

| <i>Case fatality</i>       | Any stroke |       |       | Ischemic stroke |       |       | Intracerebral hemorrhage |       |       | Stroke not otherwise specified |       |       |
|----------------------------|------------|-------|-------|-----------------|-------|-------|--------------------------|-------|-------|--------------------------------|-------|-------|
|                            | Year       | total | men   | women           | total | men   | women                    | total | men   | women                          | total | men   |
| 1998                       | 15.2%      | 16.3% | 14.2% | 8.4%            | 9.2%  | 7.9%  | 37.9%                    | 36.0% | 39.7% | 9.2%                           | 11.4% | 7.2%  |
| 1999                       | 13.7%      | 13.0% | 14.3% | 7.8%            | 9.2%  | 6.8%  | 36.4%                    | 29.9% | 42.3% | 4.3%                           | 4.7%  | 3.9%  |
| 2000                       | 16.5%      | 14.8% | 17.9% | 10.2%           | 8.1%  | 11.9% | 38.9%                    | 34.1% | 43.5% | 6.5%                           | 8.2%  | 4.8%  |
| 2001                       | 14.4%      | 14.4% | 14.4% | 10.9%           | 10.8% | 11.0% | 36.3%                    | 32.8% | 39.7% | 2.3%                           | 1.1%  | 2.9%  |
| 2002                       | 14.4%      | 15.8% | 13.2% | 9.7%            | 10.1% | 9.5%  | 37.7%                    | 37.2% | 38.2% | 6.1%                           | 6.1%  | 6.0%  |
| 2003                       | 14.0%      | 14.4% | 13.7% | 8.0%            | 9.4%  | 6.7%  | 40.4%                    | 39.8% | 41.0% | 7.1%                           | 3.1%  | 10.7% |
| 2004                       | 10.8%      | 10.1% | 11.4% | 7.0%            | 7.0%  | 7.0%  | 29.5%                    | 24.6% | 35.0% | 3.5%                           | 3.6%  | 3.3%  |
| 2005                       | 10.6%      | 11.0% | 10.3% | 7.1%            | 6.3%  | 7.7%  | 30.6%                    | 32.3% | 28.8% | 2.7%                           | 2.0%  | 3.3%  |
| 2006                       | 9.4%       | 9.8%  | 9.0%  | 7.4%            | 7.3%  | 7.5%  | 24.2%                    | 25.2% | 23.1% | 2.4%                           | 2.1%  | 2.6%  |
| 2007                       | 10.1%      | 9.4%  | 10.7% | 6.5%            | 5.9%  | 7.0%  | 30.6%                    | 28.0% | 33.3% | 2.5%                           | 1.6%  | 3.3%  |
| 2008                       | 8.3%       | 8.7%  | 8.0%  | 4.0%            | 4.7%  | 3.5%  | 27.7%                    | 25.9% | 29.6% | 3.6%                           | 1.8%  | 4.8%  |
| 2009                       | 9.0%       | 7.7%  | 10.3% | 6.8%            | 6.0%  | 7.6%  | 24.8%                    | 19.6% | 30.4% | 2.9%                           | 2.4%  | 3.3%  |
| 2010                       | 6.9%       | 7.8%  | 6.1%  | 4.9%            | 6.4%  | 3.7%  | 21.1%                    | 18.9% | 23.3% | 1.2%                           | 1.7%  | 0.7%  |
| linear regression p-values | <.001      | <.001 | <.001 | .002            | .001  | .022  | <.001                    | .003  | <.001 | .006                           | .005  | .100  |
| Yearly APC <sup>a</sup>    | -5.6%      | -5.2% | -4.7% | -1.3%           | -1.4% | 2.5%  | -3.8%                    | -3.3% | -3.0% | -0.4%                          | 23.4% | -0.6% |
| <i>1-year mortality</i>    | Any stroke |       |       | Ischemic stroke |       |       | Intracerebral hemorrhage |       |       | Stroke not otherwise specified |       |       |
|                            | Year       | total | men   | women           | total | men   | women                    | total | men   | women                          | total | men   |
| 1998                       | 3.7%       | 3.9%  | 3.6%  | 3.3%            | 3.9%  | 3.0%  | 8.2%                     | 6.8%  | 9.6%  | 1.7%                           | 1.8%  | 1.6%  |
| 1999                       | 3.1%       | 2.6%  | 3.5%  | 2.4%            | 1.4%  | 3.1%  | 5.7%                     | 6.1%  | 5.3%  | 2.9%                           | 2.5%  | 3.3%  |
| 2000                       | 3.6%       | 3.4%  | 3.8%  | 3.1%            | 3.4%  | 2.9%  | 8.5%                     | 6.9%  | 10.3% | 1.3%                           | 0.9%  | 1.7%  |
| 2001                       | 4.1%       | 4.3%  | 4.0%  | 3.3%            | 2.3%  | 4.2%  | 7.8%                     | 8.8%  | 6.8%  | 3.6%                           | 5.8%  | 2.4%  |
| 2002                       | 3.8%       | 4.8%  | 3.0%  | 3.2%            | 4.3%  | 2.3%  | 7.6%                     | 9.9%  | 4.8%  | 3.1%                           | 2.4%  | 3.5%  |
| 2003                       | 3.8%       | 4.6%  | 2.9%  | 3.6%            | 3.7%  | 3.4%  | 6.6%                     | 9.1%  | 3.4%  | 2.9%                           | 3.9%  | 1.9%  |
| 2004                       | 3.6%       | 4.1%  | 3.2%  | 2.6%            | 2.5%  | 2.6%  | 9.8%                     | 11.5% | 7.5%  | 2.1%                           | 1.9%  | 2.3%  |
| 2005                       | 3.1%       | 4.3%  | 2.1%  | 2.4%            | 3.4%  | 1.7%  | 7.3%                     | 10.0% | 4.5%  | 2.2%                           | 2.7%  | 1.7%  |
| 2006                       | 2.4%       | 3.1%  | 1.9%  | 1.7%            | 1.7%  | 1.7%  | 4.6%                     | 4.3%  | 4.8%  | 2.8%                           | 5.0%  | 0.7%  |
| 2007                       | 2.9%       | 3.6%  | 2.3%  | 2.6%            | 3.1%  | 2.0%  | 6.9%                     | 8.2%  | 5.4%  | 1.5%                           | 1.6%  | 1.4%  |
| 2008                       | 2.9%       | 2.7%  | 3.1%  | 2.7%            | 2.8%  | 2.6%  | 3.1%                     | 1.2%  | 5.3%  | 3.3%                           | 3.6%  | 3.1%  |
| 2009                       | 1.8%       | 1.4%  | 2.1%  | 1.0%            | 0.6%  | 1.5%  | 5.6%                     | 5.6%  | 5.6%  | 1.5%                           | 0.8%  | 2.0%  |
| 2010                       | 2.3%       | 3.1%  | 1.6%  | 1.2%            | 1.9%  | 0.7%  | 6.1%                     | 7.0%  | 5.1%  | 2.8%                           | 3.5%  | 2.2%  |
| linear regression p-values | .002       | 1.33  | .001  | .005            | 1.51  | .003  | .065                     | .342  | .069  | .973                           | .858  | .648  |
| Yearly APC                 | -2.2%      | 4.7%  | -4.2% | -2.8%           | 23.9% | -4.8% | 5.4%                     | 33.2% | 4.2%  | 24.1%                          | 76.1% | 20.3% |

| 5-year mortality                  | Any stroke      |             |             | Ischemic stroke |             |             | Intracerebral hemorrhage |       |       | Stroke not otherwise specified |       |       |
|-----------------------------------|-----------------|-------------|-------------|-----------------|-------------|-------------|--------------------------|-------|-------|--------------------------------|-------|-------|
|                                   | Year            | total       | men         | women           | total       | men         | women                    | total | men   | women                          | total | men   |
| <b>1998</b>                       | 8.3%            | 9.8%        | 7.1%        | 8.0%            | 9.2%        | 7.2%        | 9.6%                     | 9.6%  | 9.6%  | 8.0%                           | 11.0% | 5.4%  |
| <b>1999</b>                       | 7.4%            | 7.3%        | 7.4%        | 6.9%            | 6.9%        | 6.9%        | 8.3%                     | 8.5%  | 8.0%  | 7.8%                           | 7.4%  | 8.1%  |
| <b>2000</b>                       | 8.5%            | 9.8%        | 7.2%        | 8.2%            | 10.5%       | 6.2%        | 13.3%                    | 12.6% | 14.1% | 5.7%                           | 6.3%  | 5.1%  |
| <b>2001</b>                       | 8.4%            | 10.2%       | 6.9%        | 7.4%            | 8.2%        | 6.7%        | 11.8%                    | 16.3% | 6.8%  | 8.4%                           | 10.5% | 7.3%  |
| <b>2002</b>                       | 8.2%            | 9.6%        | 7.0%        | 6.1%            | 9.1%        | 3.9%        | 13.9%                    | 13.6% | 14.3% | 9.2%                           | 8.1%  | 9.9%  |
| <b>2003</b>                       | 7.3%            | 9.6%        | 5.1%        | 6.2%            | 8.2%        | 4.4%        | 14.0%                    | 14.3% | 13.6% | 6.4%                           | 9.7%  | 3.1%  |
| <b>2004</b>                       | 7.7%            | 7.9%        | 7.5%        | 6.2%            | 5.8%        | 6.6%        | 14.7%                    | 17.3% | 11.3% | 6.6%                           | 5.6%  | 7.4%  |
| <b>2005</b>                       | 6.8%            | 8.6%        | 5.3%        | 5.8%            | 8.1%        | 3.9%        | 13.4%                    | 17.8% | 9.0%  | 5.3%                           | 4.1%  | 6.2%  |
| <b>2006</b>                       | 5.8%            | 7.1%        | 4.6%        | 4.5%            | 4.8%        | 4.2%        | 8.6%                     | 9.8%  | 7.2%  | 7.0%                           | 10.0% | 4.1%  |
| <b>2007</b>                       | 7.1%            | 8.1%        | 6.2%        | 6.2%            | 7.5%        | 4.9%        | 13.2%                    | 12.9% | 13.5% | 5.9%                           | 6.4%  | 5.4%  |
| <b>2008</b>                       | 5.7%            | 6.4%        | 5.2%        | 5.2%            | 5.9%        | 4.7%        | 10.5%                    | 10.5% | 10.5% | 4.1%                           | 4.5%  | 3.8%  |
| <b>2009</b>                       | 5.4%            | 4.8%        | 5.9%        | 4.8%            | 4.3%        | 5.3%        | 8.7%                     | 8.9%  | 8.5%  | 4.8%                           | 3.2%  | 6.1%  |
| <b>2010</b>                       | 5.2%            | 7.3%        | 3.5%        | 3.0%            | 4.0%        | 2.2%        | 12.1%                    | 15.1% | 8.9%  | 7.2%                           | 10.4% | 4.4%  |
| <b>linear regression p-values</b> | <b>&lt;.001</b> | <b>.006</b> | <b>.003</b> | <b>&lt;.001</b> | <b>.002</b> | <b>.006</b> | .977                     | .792  | .695  | <b>.046</b>                    | .227  | .181  |
| <b>Yearly APC</b>                 | -3.1%           | -0.0%       | -2.7%       | -6.2%           | -1.9%       | -4.5%       | 5.9%                     | 8.5%  | 8.8%  | 2.8%                           | 18.4% | 12.2% |

APC stands for percentage change, trends over time were tested through linear regression.
